# Supplementary material for: Path Analysis Reveals the Direct Effect of PCB28 Exposure on Cognitive Dysfunction in Older Chinese Females
Source: MDPI journal article supplement (doi:10.3390/ijerph19126958), 2022-06-07
Supplement: s1 [file ijerph-1537367-supplementary.pdf › ijerph-1537367-supplementary.pdf]

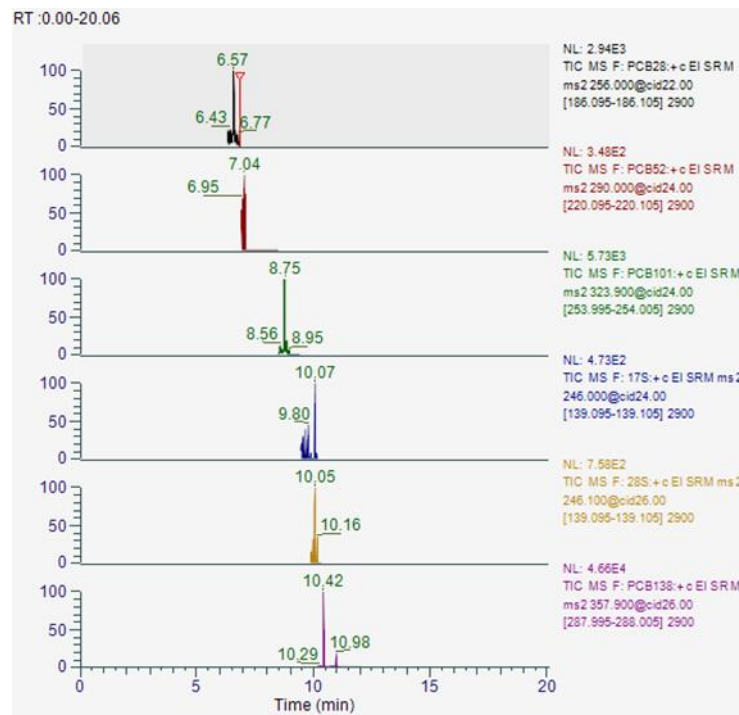

(a)

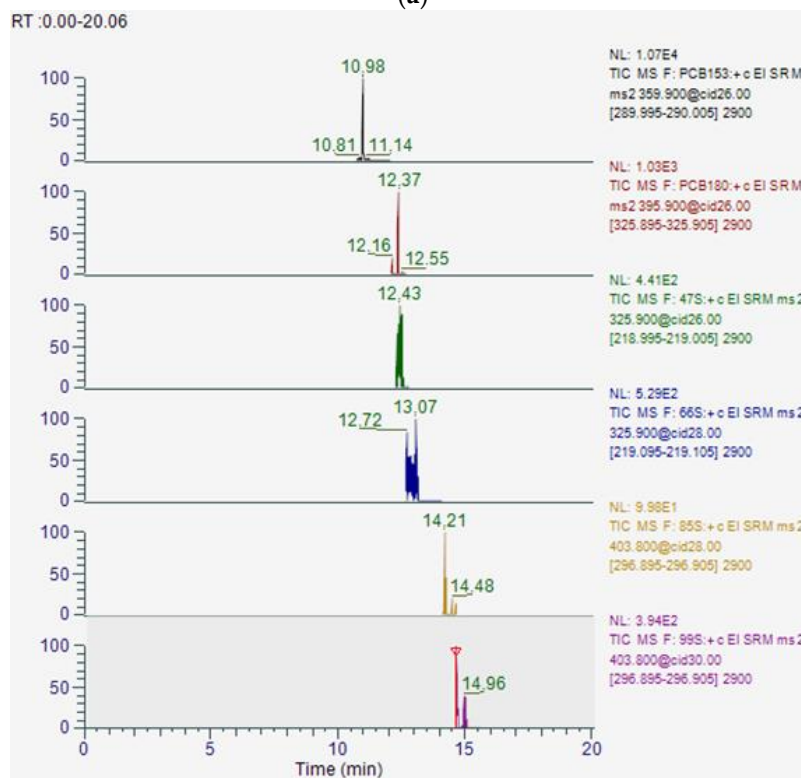

(b)

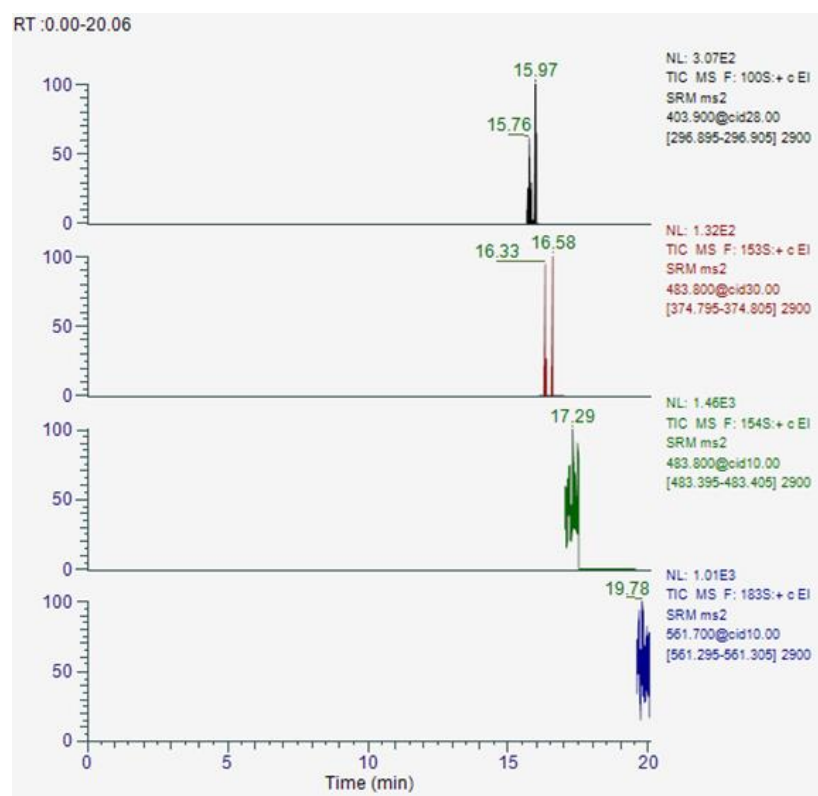

(c)

**Figure S1.** The chromatogram of a real sample.

RT :0.00-20.06

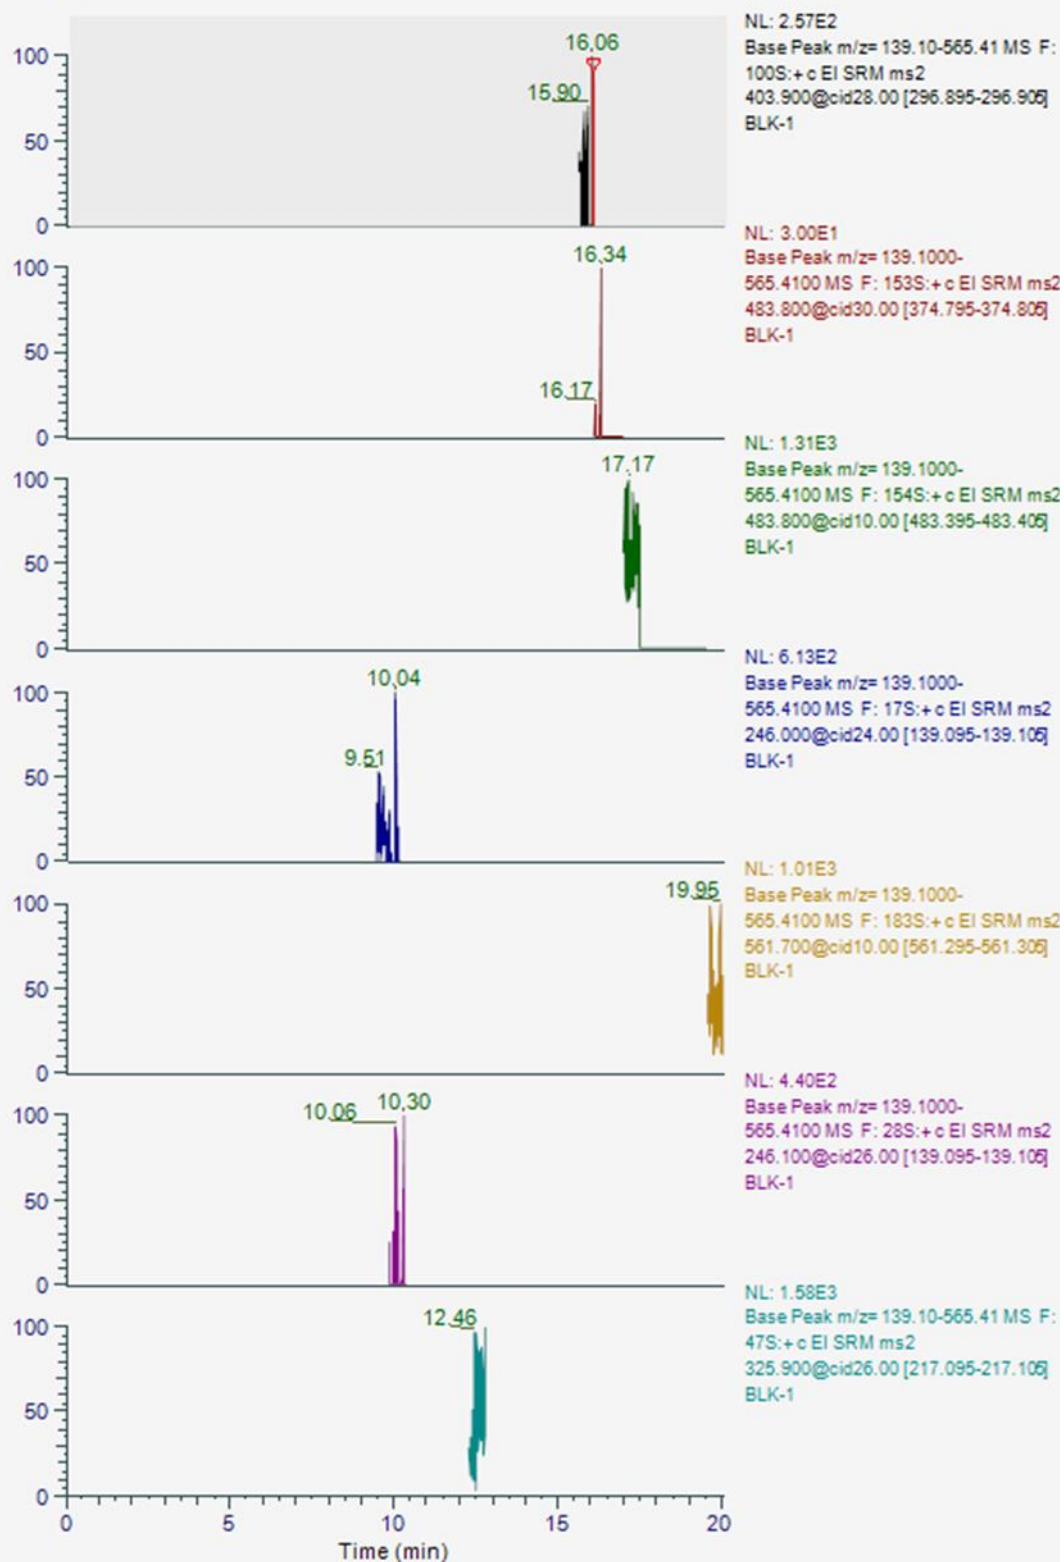

(a)

RT :0.00-20.06

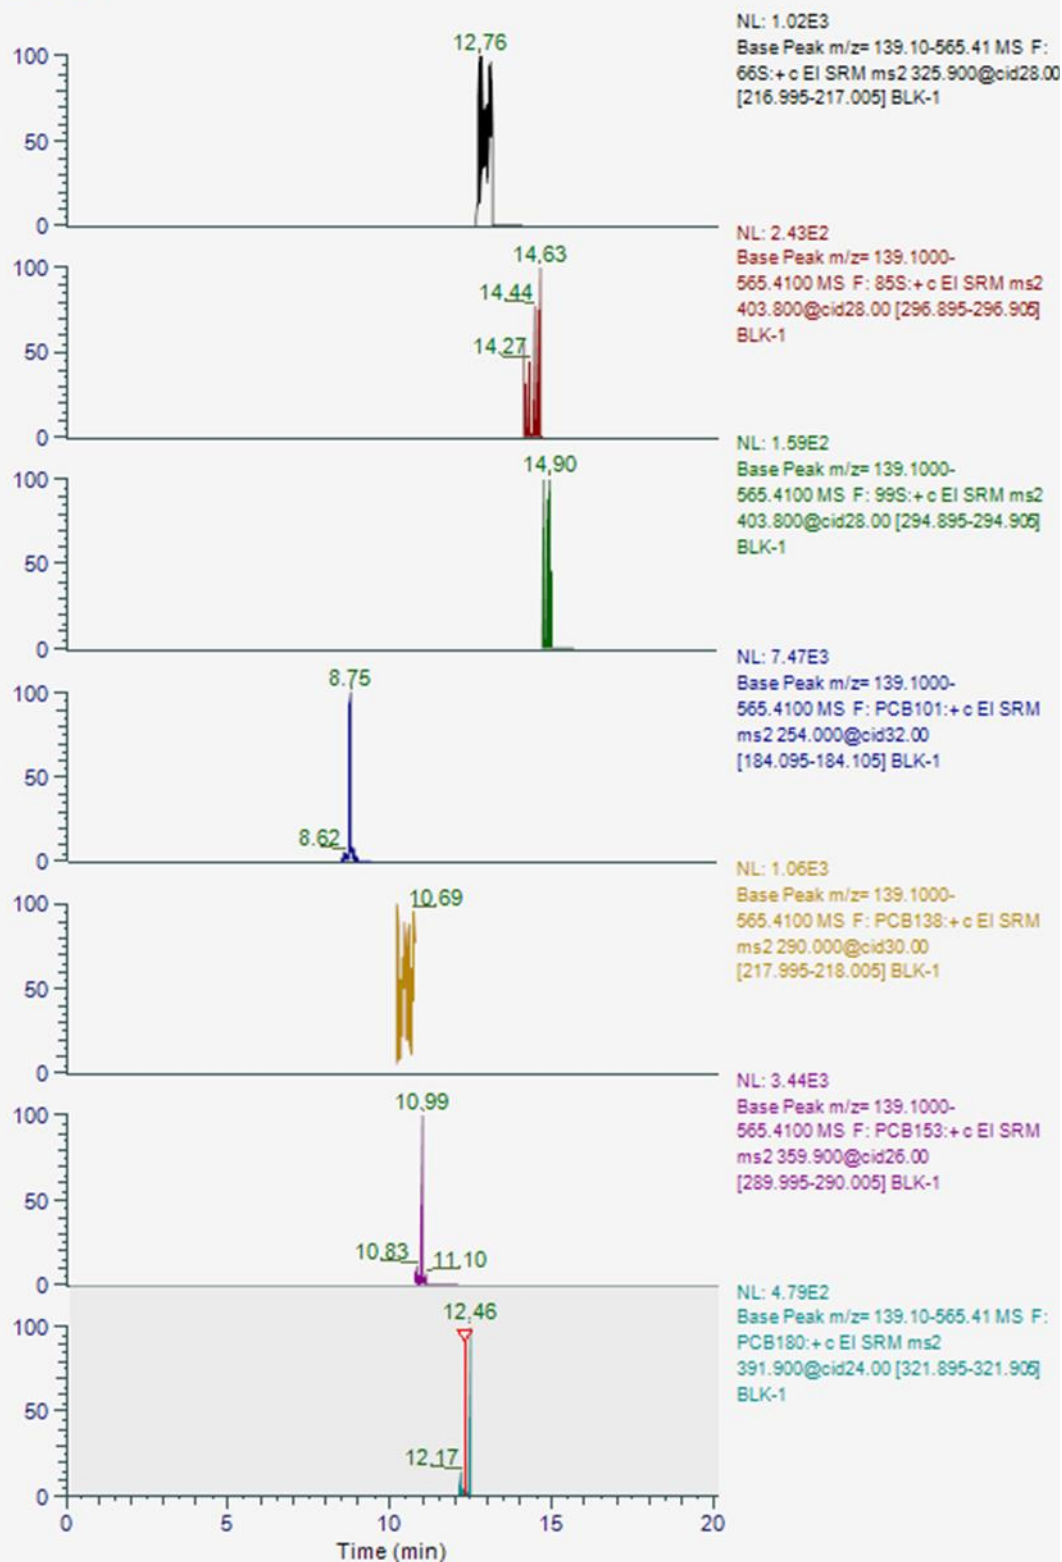

(b)

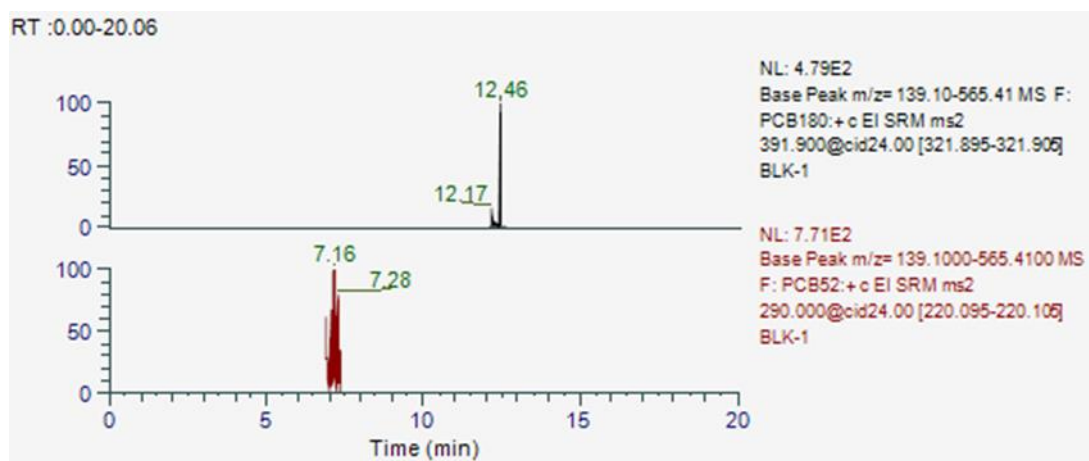

(c)

Figure S2. The chromatogram of a blank sample.

Table S1. Final SEM path coefficients showed the association among 4 PCBs (PCB 28, PCB 101, PCB 138, PCB 153), cognitive dysfunction and covariates for female participants.

| Path                       | Path coefficient |                     | <i>p</i> |
|----------------------------|------------------|---------------------|----------|
|                            | Estimate         | Standard Error (SE) |          |
| Females & Age ≤ 80 (N=125) |                  |                     |          |
| a                          |                  |                     |          |
| Age → CoD                  | 0.059            | 0.029               | 0.044    |
| Education level → CoD      | -0.591           | 0.333               | 0.076    |
| Monthly income → CoD       | -0.052           | 0.303               | 0.864    |
| Marriage → CoD             | -0.197           | 0.447               | 0.659    |
| Children → CoD             | -0.265           | 0.282               | 0.347    |
| Sleep duration → CoD       | 0.152            | 0.153               | 0.321    |
| Sleep quality → CoD        | -0.348           | 0.134               | 0.010*   |
| Headache → CoD             | 0.321            | 0.128               | 0.012*   |
| PCB 28 → CoD               | 0.670            | 0.339               | 0.048*   |
| PCB 101 → CoD              | 0.168            | 0.295               | 0.570    |
| PCB 138 → CoD              | -0.423           | 1.103               | 0.701    |
| PCB 153 → CoD              | -0.236           | 1.114               | 0.832    |
| PCB 28 → Headache          | -0.509           | 0.415               | 0.220    |
| PCB 101 → Headache         | -0.177           | 0.307               | 0.565    |
| PCB 138 → Headache         | -0.342           | 0.476               | 0.473    |
| PCB 153 → Headache         | 0.140            | 0.540               | 0.795    |

|                     |       |       |       |
|---------------------|-------|-------|-------|
| Age → Sleep quality | 0.032 | 0.027 | 0.236 |
|---------------------|-------|-------|-------|

---

a: model fit index ( $X^2$   $p$  value = 0.463, CFI = 1.000, RMSEA = 0.000).

Criterion for good fit:  $X^2$   $p$  value > 0.05, CFI > 0.95, RMSEA < 0.05.

\*  $p$  < 0.05
